# Supplementary material for: Cancer survival for Aboriginal and Torres Strait Islander Australians: a national study of survival rates and excess mortality
Source: PubMed Central journal article supplement (PMC3909914; doi:10.1186/1478-7954-12-1), 2014-01-31
Supplement: 1478-7954-12-1-S2.pdf [file 1478-7954-12-1-S2.pdf]

**Table 7. Cause-specific compared with relative survival, five-year survival rate (%)<sup>1</sup> by Indigenous status and site, Australia excluding Victoria, 2001-2005.**

| Cancer site/type        | Indigenous |                |                         | Non-Indigenous |                |                         |
|-------------------------|------------|----------------|-------------------------|----------------|----------------|-------------------------|
|                         | Relative   | Cause-Specific | Difference <sup>2</sup> | Relative       | Cause-Specific | Difference <sup>2</sup> |
| Head & neck             | 31.5       | 37.8           | 6.3                     | 59.3           | 73.7           | 14.4                    |
| Stomach                 | 15.0       | 15.9           | 0.9                     | 27.7           | 27.9           | 0.2                     |
| Colorectal              | 58.0       | 52.9           | -5.2                    | 65.0           | 63.3           | -1.7                    |
| Anus                    | 47.7       | 59.2           | 11.6                    | 64.3           | 65.9           | 1.6                     |
| Liver                   | 10.2       | 12.7           | 2.5                     | 14.4           | 16.6           | 2.2                     |
| Pancreas                | 10.5       | 9.7            | -0.8                    | 6.0            | 6.1            | 0.1                     |
| Lung                    | 9.0        | 8.4            | -0.6                    | 14.2           | 15.5           | 1.2                     |
| Melanoma                | 76.7       | 78.9           | 2.2                     | 92.4           | 91.1           | -1.3                    |
| Breast                  | 78.4       | 76.1           | -2.3                    | 89.2           | 87.9           | -1.3                    |
| Cervix                  | 57.6       | 60.0           | 2.4                     | 73.7           | 75.3           | 1.6                     |
| Uterus                  | 77.9       | 73.4           | -4.4                    | 82.2           | 81.5           | -0.7                    |
| Ovary                   | 51.0       | 48.0           | -3.0                    | 41.8           | 42.4           | 0.6                     |
| Prostate                | 81.0       | 81.1           | 0.2                     | 89.7           | 87.0           | -2.7                    |
| Testis                  | 94.1       | 91.7           | -2.5                    | 96.2           | 96.8           | 0.6                     |
| Kidney                  | 65.7       | 68.1           | 2.4                     | 68.5           | 70.2           | 1.7                     |
| Bladder                 | 52.8       | 61.4           | 8.5                     | 63.9           | 67.8           | 3.9                     |
| Brain                   | 41.8       | 43.8           | 2.1                     | 20.9           | 21.8           | 0.9                     |
| Thyroid                 | 84.4       | 87.2           | 2.8                     | 95.1           | 95.3           | 0.2                     |
| Hodgkin lymphoma        | 100.4      | 100.0          | -0.4                    | 83.7           | 85.4           | 1.7                     |
| Non-Hodgkin lymphoma    | 55.4       | 58.4           | 3.0                     | 65.5           | 68.0           | 2.6                     |
| Leukaemia               | 52.0       | 62.9           | 10.9                    | 53.2           | 64.3           | 11.1                    |
| Unknown primary         | 14.4       | 16.0           | 1.6                     | 17.0           | 20.9           | 3.9                     |
| Others                  | 40.1       | 45.2           | 5.1                     | 48.9           | 49.7           | 0.8                     |
|                         |            |                |                         |                |                |                         |
| Allcancers <sup>3</sup> | 45.8       | 47.0           | 1.2                     | 64.6           | 65.6           | 1.0                     |

1. not adjusted for age.

2. cause-specific minus relative.

3. not adjusted for site.
