# Supplementary material for: Cancer survival for Aboriginal and Torres Strait Islander Australians: a national study of survival rates and excess mortality
Source: PubMed Central journal article supplement (PMC3909914; doi:10.1186/1478-7954-12-1), 2014-01-31
Supplement: 1478-7954-12-1-S3.pdf [file 1478-7954-12-1-S3.pdf]

**Table 4a Regression analysis of cause-specific mortality for all cancers combined, Australia (excluding Victoria) 1991-2005 (full model).**

|                                    | HR <sup>1</sup> | (95%CI)     |
|------------------------------------|-----------------|-------------|
| Indigenous <sup>2</sup>            |                 |             |
| 1st year after diagnosis           | 1.50            | (1.41-1.60) |
| 2nd year after diagnosis           | 1.23            | (1.11-1.35) |
| 3rd year after diagnosis           | 1.21            | (1.07-1.38) |
| 4th year after diagnosis           | 1.16            | (0.98-1.37) |
| 5th year after diagnosis           | 0.99            | (0.79-1.23) |
| Sex                                |                 |             |
| Female                             | 0.93            | (0.92-0.93) |
| Age at diagnosis (per year of age) |                 |             |
| Non-Indigenous                     | 1.03            | (1.03-1.03) |
| Indigenous                         | 1.02            | (1.02-1.02) |
| Remoteness (per ARIA category)     |                 |             |
| Non-Indigenous                     | 1.05            | (1.05-1.06) |
| Indigenous                         | 1.13            | (1.11-1.16) |
| Cancer site/type <sup>3</sup>      |                 |             |
| Head & neck                        | 0.73            | (0.72-0.75) |
| Stomach                            | 2.88            | (2.83-2.94) |
| Anus                               | 0.97            | (0.90-1.03) |
| Liver                              | 4.82            | (4.69-4.96) |
| Pancreas                           | 6.48            | (6.37-6.60) |
| Lung                               | 4.16            | (4.11-4.21) |
| Melanoma                           | 0.23            | (0.23-0.24) |
| Breast                             | 0.37            | (0.37-0.38) |
| Cervix                             | 0.92            | (0.89-0.96) |
| Uterus                             | 0.47            | (0.45-0.49) |
| Ovary                              | 2.15            | (2.10-2.21) |
| Prostate                           | 0.31            | (0.30-0.32) |
| Testis                             | 0.15            | (0.13-0.17) |
| Kidney                             | 0.95            | (0.92-0.97) |
| Bladder                            | 0.72            | (0.70-0.73) |
| Brain                              | 5.60            | (5.48-5.72) |
| Thyroid                            | 0.20            | (0.19-0.22) |
| Hodgkin lymphoma                   | 0.66            | (0.61-0.72) |
| Non-Hodgkin lymphoma               | 1.12            | (1.10-1.14) |
| Leukaemia                          | 1.24            | (1.21-1.27) |
| Unknown primary                    | 5.52            | (5.44-5.61) |
| Others                             | 1.60            | (1.57-1.62) |

1. Hazard ratio

2. Applies to the reference categories of the interaction terms (i.e. people of median age 59 years and resident in major cities).

3. compared to colorectal cancer.
