# Supplementary material for: Cancer survival for Aboriginal and Torres Strait Islander Australians: a national study of survival rates and excess mortality
Source: PubMed Central journal article supplement (PMC3909914; doi:10.1186/1478-7954-12-1), 2014-01-31
Supplement: 1478-7954-12-1-S5.pdf [file 1478-7954-12-1-S5.pdf]

**Table 8 Regression analysis<sup>1</sup> for all-cancers combined including an interaction term for year of diagnosis by remoteness category, hazard ratio (95% confidence interval), Australia (excluding Victoria) 1991-2005.**

|                                | Non-Indigenous |             | Indigenous |             |
|--------------------------------|----------------|-------------|------------|-------------|
| Sex                            | 0.95           | (0.94-0.95) | 0.95       | (0.88-1.03) |
| Age                            | 1.03           | (1.03-1.03) | 1.02       | (1.02-1.02) |
| Year                           | 0.98           | (0.98-0.98) | 1.01       | (0.99-1.03) |
| Remoteness (per ARIA category) | 1.06           | (1.05-1.07) | 1.11       | (1.06-1.16) |
| Year by remoteness interaction | 1.00           | (1.00-1.00) | 0.99       | (0.99-1.00) |
| Site <sup>2</sup>              |                |             |            |             |
| Head & neck                    | 0.75           | (0.73-0.77) | 1.52       | (1.26-1.84) |
| Stomach                        | 3.09           | (3.03-3.16) | 2.67       | (2.11-3.37) |
| Anus                           | 0.88           | (0.81-0.96) | 1.11       | (0.62-2.00) |
| Liver                          | 5.34           | (5.19-5.50) | 3.56       | (2.84-4.48) |
| Pancreas                       | 6.87           | (6.74-7.00) | 5.30       | (4.29-6.55) |
| Lung                           | 4.41           | (4.35-4.47) | 3.49       | (2.97-4.10) |
| Melanoma                       | 0.20           | (0.19-0.20) | 0.20       | (0.10-0.39) |
| Breast                         | 0.26           | (0.25-0.26) | 0.32       | (0.25-0.41) |
| Cervix                         | 0.91           | (0.86-0.95) | 1.04       | (0.81-1.34) |
| Uterus                         | 0.46           | (0.44-0.49) | 0.46       | (0.32-0.66) |
| Ovary                          | 1.98           | (1.92-2.04) | 1.21       | (0.86-1.71) |
| Prostate                       | 0.24           | (0.23-0.25) | 0.31       | (0.22-0.42) |
| Testis                         | 0.19           | (0.16-0.22) | 0.43       | (0.17-1.04) |
| Kidney                         | 1.06           | (1.03-1.09) | 0.87       | (0.61-1.24) |
| Bladder                        | 0.74           | (0.72-0.76) | 0.94       | (0.67-1.31) |
| Brain                          | 6.19           | (6.04-6.33) | 3.06       | (2.26-4.14) |
| Thyroid                        | 0.24           | (0.22-0.26) | 0.28       | (0.16-0.48) |
| Hodgkin lymphoma               | 0.71           | (0.65-0.78) | 0.00       | -           |
| Non-Hodgkin lymphoma           | 1.19           | (1.16-1.22) | 1.62       | (1.25-2.10) |
| Leukaemia                      | 1.35           | (1.32-1.38) | 1.72       | (1.33-2.23) |
| Unknown primary                | 6.32           | (6.22-6.42) | 4.43       | (3.70-5.31) |
| Others                         | 1.69           | (1.66-1.72) | 1.59       | (1.32-1.90) |

1. cause-specific mortality in two years after diagnosis, stratified by Indigenous status

2. compared to colorectal cancer.
